# Supplementary material for: Cerebello-frontal effective dysconnectivity and reduced white matter integrity promote manic symptoms in bipolar disorder
Source: Research Square preprint supplement (doi:10.21203/rs.3.rs-7696232/v1), 2025-10-15
Supplement: Supplementary file 1 [file 0cd7ae9a8b6a94acc7c71071.docx]

# Methods

## MRI data

### Acquisition

We used a 1.5-T GE scanner with a standard head coil for MRI recording. Foam pads were employed to reduce head motion and scanner noise. Through a 3D-SPGR sequence (TR/TE=11.5/5 ms, IR=500 ms, flip angle=8 degree, FOV=25.6 cm) with a resolution in-plane of 256x256 and slice thickness of 1 mm, we were able to acquire three-dimensional T1-weighted anatomical images in a sagittal orientation. Functional images were collected by using a gradient echo Echo Planar Imaging (EPI) sequence sensitive to BOLD contrast (TR/TE = 2000/30 ms, flip angle = 90°, FOV = 24 cm). Whole-brain volumes were acquired in 33 contiguous 4-mm-thick transverse slices, with a 1-mm gap and 3.75 × 3.75-mm2 in-plane resolution. For each participant, fMRI scanning lasted 6 min and acquired a total of 150 scans. DTI was acquired with a pure axial single-shot echo-planar imaging sequence. The diffusion sensitizing gradients were applied along 60 non-collinear directions (b=1000 s/mm2), together with 5 acquisitions without diffusion weighting (b=0). Fifty-five contiguous axial slices were acquired with a slice thickness of 2.5 mm without a gap. The acquisition parameters were as follows: TR/TE=13750/93 ms; image matrix=128x128; FOV=24 cm; NEX=1.

### Resting State Data

#### Preprocessing

Functional and anatomical data were preprocessed using a flexible preprocessing pipeline (Nieto-Castanon, 2020c) including realignment with correction of susceptibility distortion interactions, slice timing correction, outlier detection, direct segmentation and MNI-space normalization, and smoothing. Functional data were realigned using SPM realign & unwarp procedure (Andersson et al., 2001), where all scans were coregistered to a reference image (first scan of the first session) using a least squares approach and a 6 parameter (rigid body) transformation (Friston et al., 1995) and resampled using b-spline interpolation to correct for motion and magnetic susceptibility interactions. Temporal misalignment between different slices of the functional data (acquired in interleaved bottom-up order) was corrected following SPM slice-timing correction (STC) procedure (Henson et al., 1999; Sladky et al., 2011), using sinc temporal interpolation to resample each slice BOLD timeseries to a common mid-acquisition time. Potential outlier scans were identified using ART (Whitfield-Gabrieli S. et al., 2011) as acquisitions with framewise displacement above 0.9 mm or global BOLD signal changes above 5 standard deviations (Power et al., 2014), and a reference BOLD image was computed for each subject by averaging all scans excluding outliers. Functional and anatomical data were normalized into standard MNI space, segmented into grey matter, white matter, and CSF tissue classes, and resampled to 2 mm isotropic voxels following a direct normalization procedure (Calhoun et al., 2017) using SPM unified segmentation and normalization algorithm (Ashburner, 2007; Ashburner & Friston, 2005) with the default IXI-549 tissue probability map template. Last, functional data was smoothed using spatial convolution with a Gaussian kernel of 8 mm full width half maximum (FWHM).

#### Denoising

In addition, functional data were denoised using a standard denoising pipeline (Nieto-Castanon, 2020b) including the regression of potential confounding effects characterized by white matter timeseries (5 CompCor noise components), CSF timeseries (5 CompCor noise components), motion parameters and their first order derivatives (12 factors) (Friston et al., 1996) , outlier scans (below 84 factors) (Power et al., 2014) , session effects and their first order derivatives (2 factors), and linear trends (2 factors) within each functional run, followed by bandpass frequency filtering of the BOLD timeseries (Hallquist et al., 2013) between 0.008 Hz and 0.09 Hz. CompCor (Behzadi et al., 2007; Chai et al., 2012) noise components within white matter and CSF were estimated by computing the average BOLD signal as well as the largest principal components orthogonal to the BOLD average, motion parameters, and outlier scans within each subject's eroded segmentation masks. From the number of noise terms included in this denoising strategy, the effective degrees of freedom of the BOLD signal after denoising were estimated to range from 11.8 to 39.4 (average 38.6) across all subjects.

#### Subject-level analysis

**ALFF_norm**: Amplitude of low frequency fluctuations (ALFF) maps characterizing low-frequency BOLD signal variability at each voxel were estimated as the root mean square (RMS) of the BOLD signal after denoising and band-pass filtering between 0.008 Hz and 0.09 Hz (H. Yang et al., 2007). ALFF measures across voxels were then rank-sorted and normalized separately for each individual subject and condition using a Gaussian inverse cumulative distribution function with zero mean and unit variance.

**fALFF_norm**: Fractional amplitude of low frequency fluctuations (fALFF) maps characterizing low-frequency BOLD signal variability at each voxel were estimated as the ratio between the root mean square (RMS) of the BOLD signal after denoising and band-pass filtering between 0.008 Hz and 0.09 Hz, divided by the same measure computed before band-pass filtering (Zou et al., 2008). FALFF measures across voxels were then rank sorted and normalized separately for each individual subject and condition using a Gaussian inverse cumulative distribution function with zero mean and unit variance.

SBFC: Seed-based functional connectivity maps (SBFC) were estimated characterizing the spatial pattern of functional connectivity with a seed area, obtained by the results of previous analyses. Functional connectivity strength was represented by Fisher-transformed bivariate correlation coefficients from a weighted general linear model (weighted-GLM) (Nieto-Castanon, 2020d), estimated separately for each seed area and target voxel, modeling the association between their BOLD signal time series.

**Spectral DCM:** The spectral DCM analyses were conducted using DCM12 implemented in the SPM12 (revision 6800, www.fil.ion.ucl.ac.uk/spm). Images previously pre-processed and normalized were used as input for this step. From an 8 mm radius sphere centered on the coordinates of the two ROI resulted from previous analyses, the principal eigenvariate was extracted. For each participant, a fully connected DCM between the two regions, with no exogenous inputs, was specified. The DCM was inverted using spectral DCM which fits the complex cross-spectral density using a power-law model of endogenous neuronal fluctuations. Due to the singularity and simplicity of the model, neither Bayesian model reduction nor Parametric Empirical Bayes (PEB) was run. The four parameters (the two self-connections and effective connectivity from Crus II to SFG and its reverse) were calculated for each subject, extracted from corresponding DCM_*.mat file and investigated at group level with standard statistical tools.

### DTI data

#### Preprocessing

The diffusion-weighted data were skull-stripped using the Brain Extraction Tool implemented in FSLv6.0 (<http://fsl.fmrib.ox.ac.uk/fsl/fslwiki/>) and then corrected for distortions caused by eddy currents and movements. The diffusion tensor (DT) was estimated on a voxel-by-voxel basis using the DTIfit toolbox, part of the FMRIB Diffusion Toolbox within FSL, to obtain fractional anisotropy (FA), mean (MD), axial (AD), and radial (RD) diffusivities maps, the latter obtained by averaging L2 and L3 images. A GPU-based bedpostX processing was done on eddy-current corrected images to allow probabilistic tractography analysis later.

#### Tractography

We reconstructed the pathways connecting a ROI located in right Crus II with a ROI located in SFG. Since both these ROIs emerged from fMRI analysis and thus were set in gray matter, two new ROIs, located at their closest interface with white matter, were created and used to start and end these tractographies. Previous anatomical studies clearly stated that structural connections between cerebellum and frontal regions follow two different routes: 1) the cerebello-thalamo-cerebral (CTC) pathway and 2) the cortico-ponto-cerebellar (CPC) pathway. The tract from Crus II to SFG pathway was reconstructed through three different tractographies using ROIs located in the following position with specific roles: 1a) the right Crus II acted as seed, right superior cerebellar peduncle (SPC) and left pontomesencephalic tegmentum (PMET) as waypoints and left Red Nucleus (RN) as target and stop, 1b) using left RN as seed and the ventral lateral nucleus (VLN) of thalamus as target and stop, 1c) using left VLN as seed and the left frontal regions as target and stop. The tract connecting SFG with Crus II belongs to the so-called fronto-cortico-ponto-cerebellar (FCPC) pathway and was reconstructed through two different tractographies: 2a) using the left SFG as seed and the cerebral peduncule (CP) as waypoint and the left pontine nucleus (PN) as target and stop, 2b) using the latter region as seed, the right middle cerebellar peduncle (MCP) as waypoint and the right Crus II as target and stop. All tractographies had an exclude mask composed by a sagittal plane located at x=0, to prevent fiber from propagating through the other hemisphere, with necessary “holes” to allow fibers decussation when expected, between r SPC and l PMET in 1a) and between l PN and r MCP in 2b). Additional exclude regions were added in some tractography. Specifications were summarized in Table S1.

| Tracts | tracto | seed | waypoints | target/stop | exclude |
| --- | --- | --- | --- | --- | --- |
| CTC | 1a | r Crus II | r SPC, l PMET | l RN | l SPC |
|  | 1b | l RN |  | l Thal |  |
|  | 1c | l Thal |  | l M/SFG |  |
| FCPC | 2a | l M/SFG | l CP | l PN | l Thal |
|  | 2b | l PN | r MCP | R Crus II | l MCP |

Table S1

Tractographies were run with the probtrackx2 FSL’s tool in the DTI native individual space. Region of interest defining starting and stop seeds, wayponts and exclude masks were manually drawn in a MNI standard space and trasformed into native space through an affine linear co-registration. The latter was calculated with flirt software using as reference a volume of the eddy-current corrected DTI image, without any diffusion gradient. Similarly to XTRACT approach, the following probtrackx extra parameters were used (--loopcheck, --opd, --ompl, --nsamples=5000, --sampvox=1, --randfib=1). Figure S1 represents a group average in the MNI space of the two tracts, together with their corresponding seed, target, waypoints and exclusions masks.


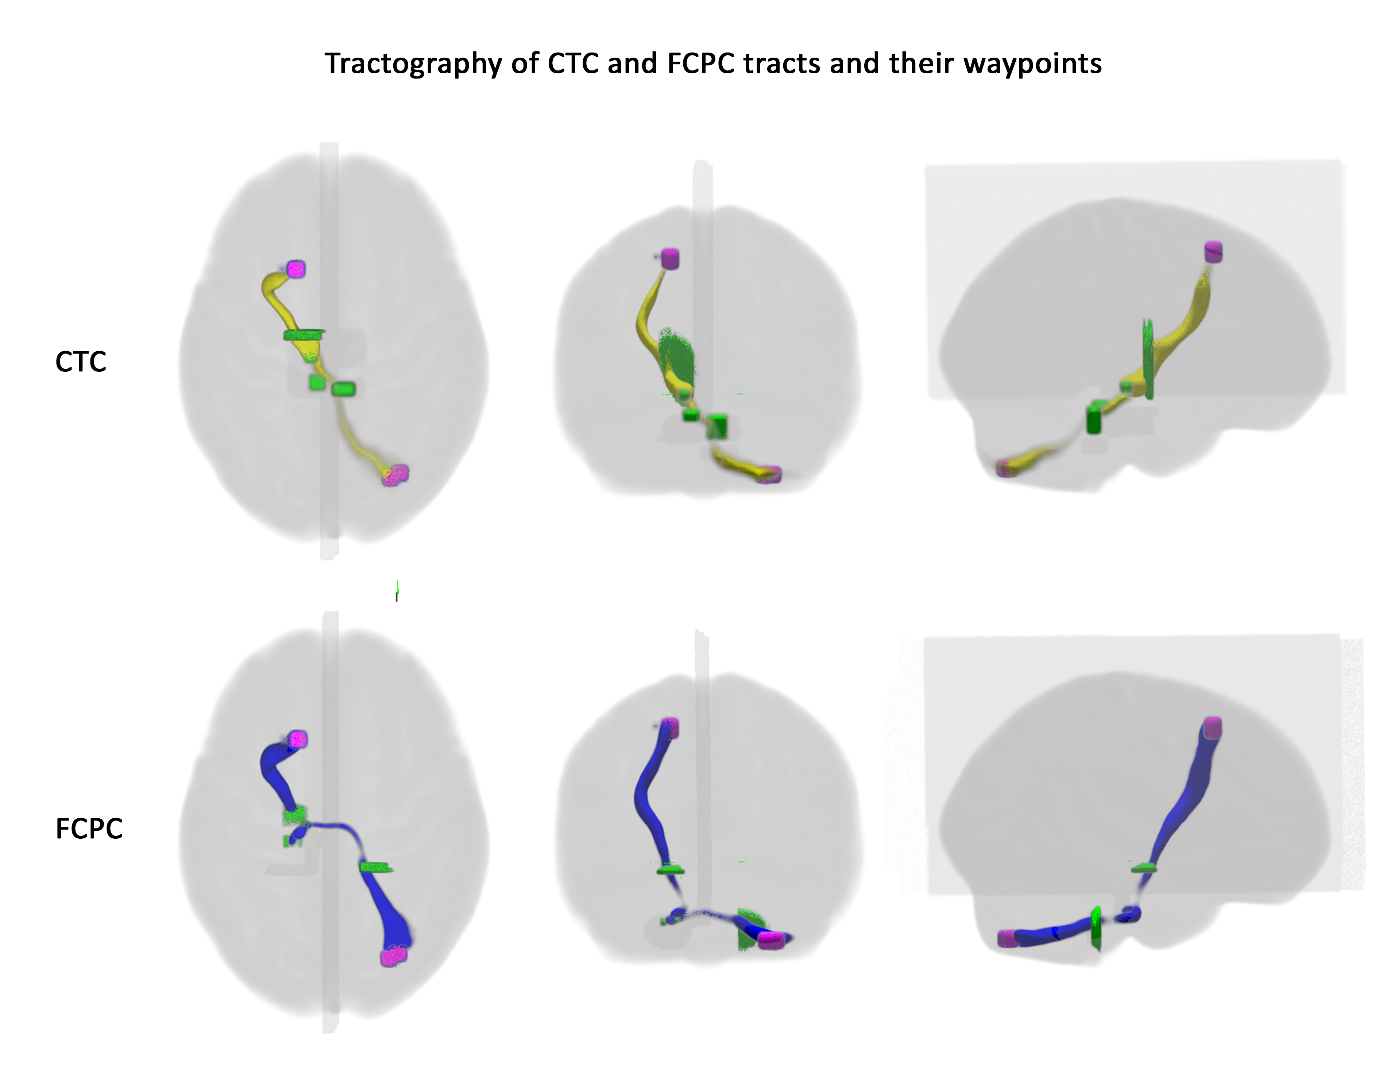


Figure S1. CTC and FCPC tracts are separately displayed together with their corresponding seed and target (violet) waypoints (green) and exclusions masks (grey).

#### Postprocessing

Reconstructed density maps of each tract were normalized by dividing voxels’ values by the total number of generated tracts that have not been rejected by inclusion/exclusion mask criteria, then thresholded removing voxels with values below 0.005 and then binarized to create the corresponding mask. The three CTC and the two FCPC tracts’ masks were summed to create the Crus II -> M/SFG and M/SFG -> Crus II tracts’ masks.
